# Supplementary material for: Metathesiscatalysts in confining reaction fields—confinement effects vs. surface effects
Source: Royal Society of Chemistry journal article supplement (doi:10.1039/b911795b), 2009-10-20

### **Supplementary Information**

#### **SI-1: Further analytical data for deactivation product 1, DP-1.**

***EDX:***

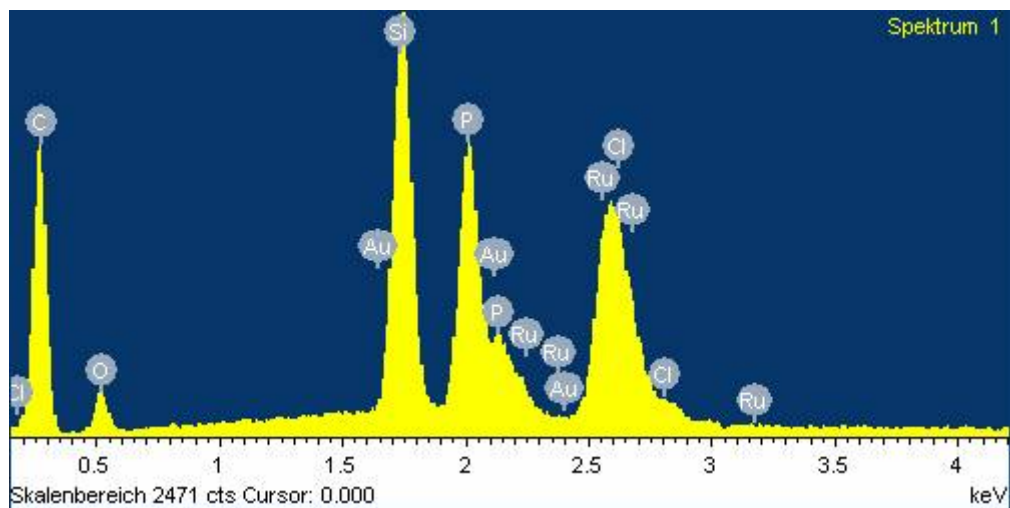

$^1\text{H-NMR}$

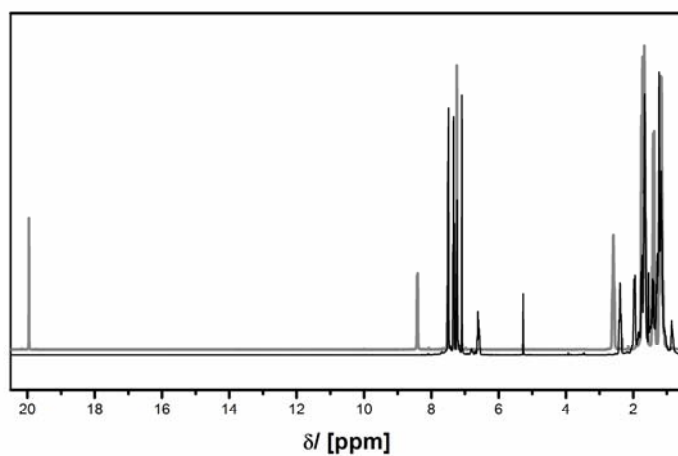

$^{13}\text{C-NMR}$

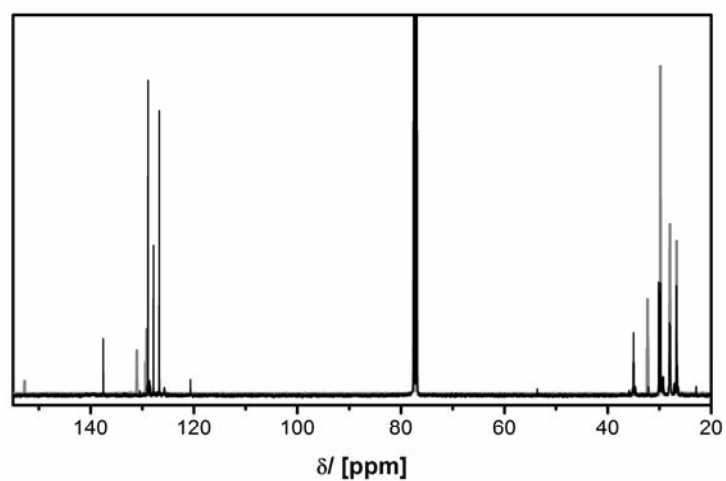

Grubbs catalyst as a reference: grey graph.

DP-1: black graph.

***MALDI-TOF MS***

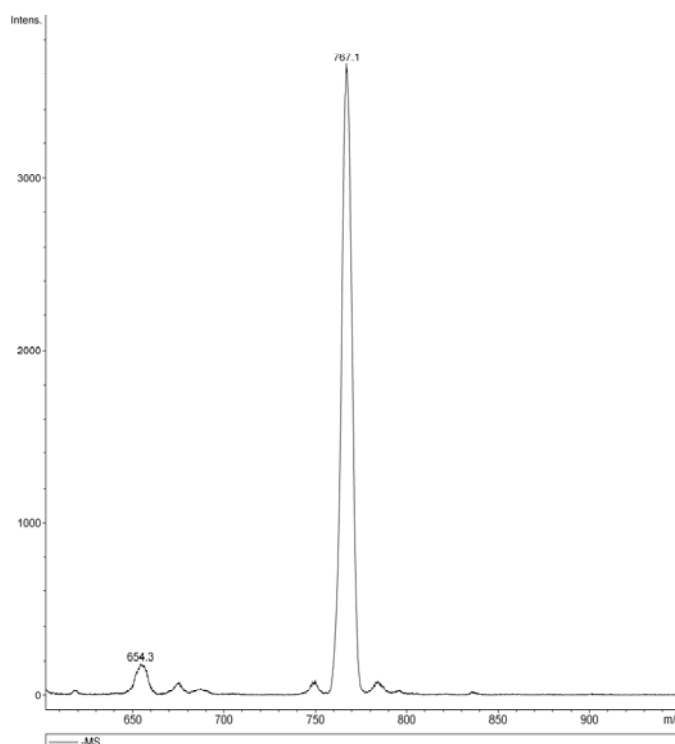

***FAB-MS***

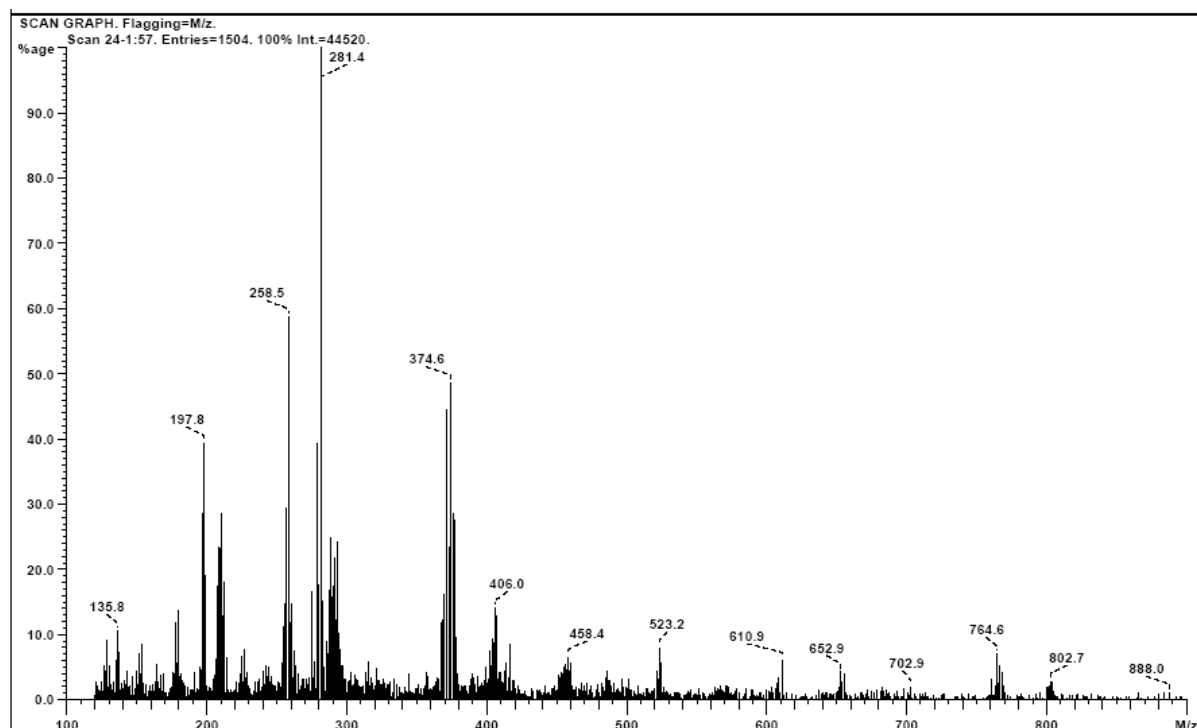

**SI-2: Analytical data for decomposition product 2; DP-3.**

$^{13}\text{C}$ -NMR:

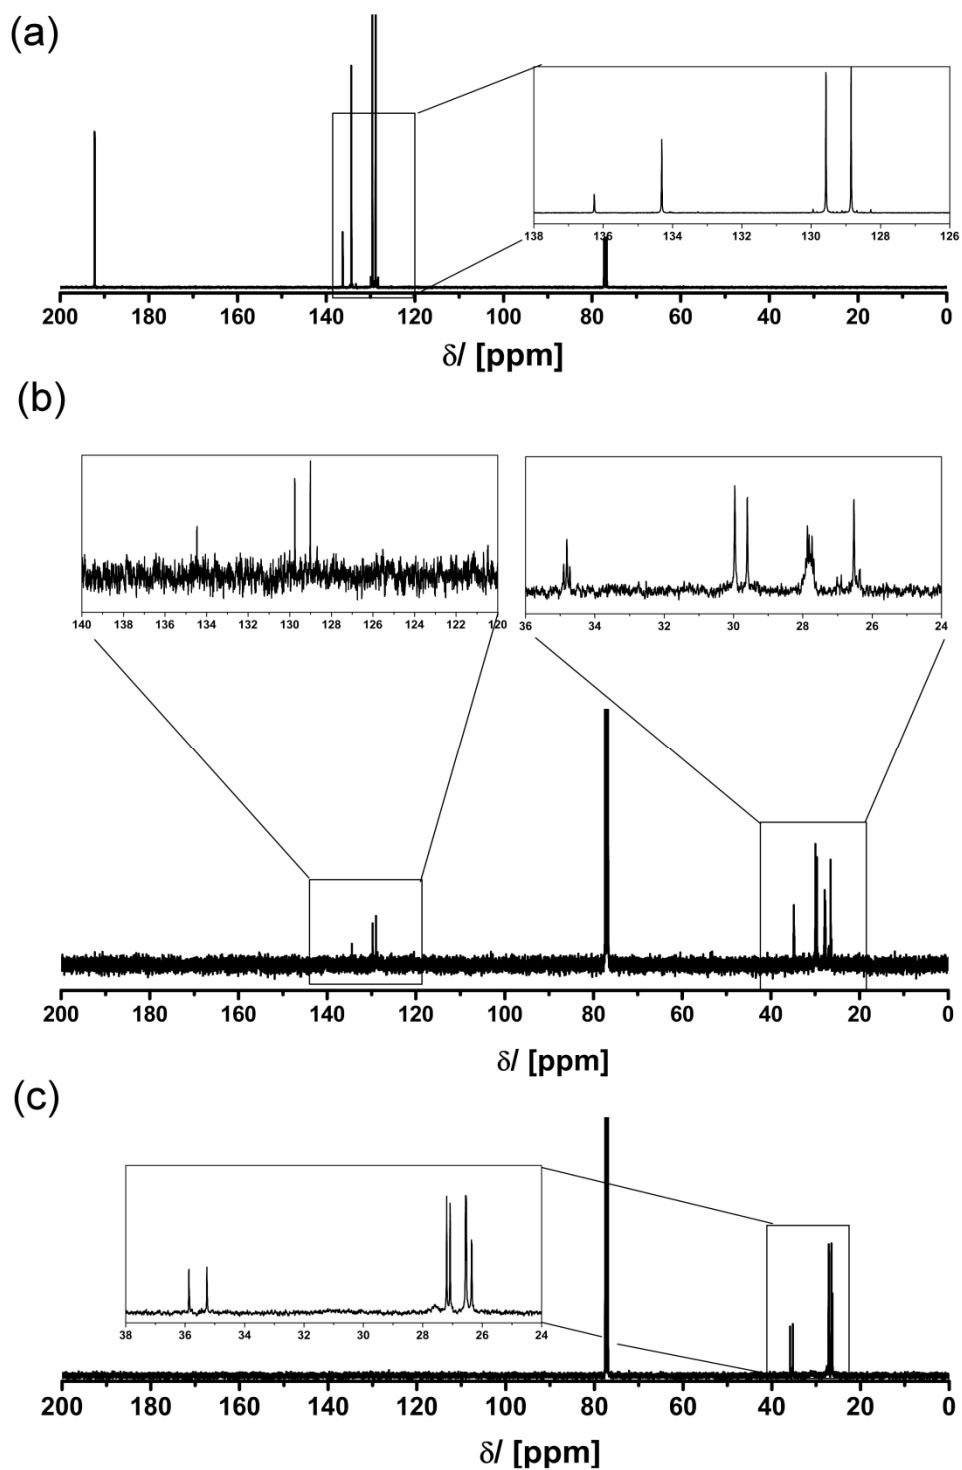

(a) benzaldehyde as a reference; (b) DP-3; (c)  $\text{PCy}_3$  as a reference.

$^1\text{H-NMR}$ :

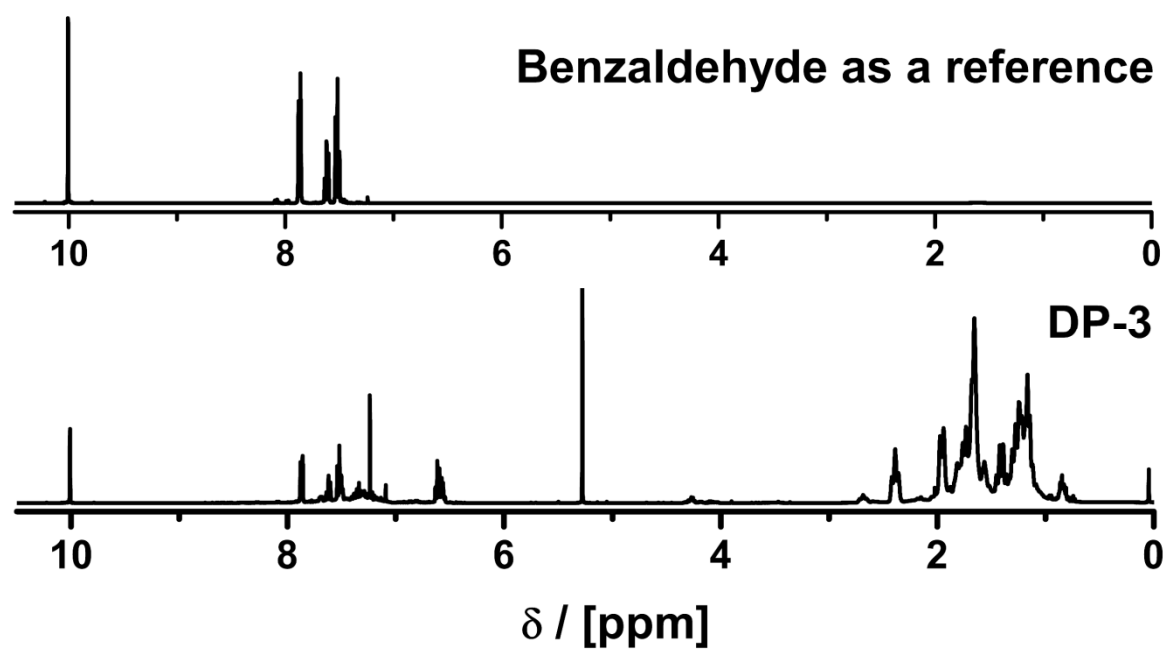

$^{31}\text{P-NMR}$ :

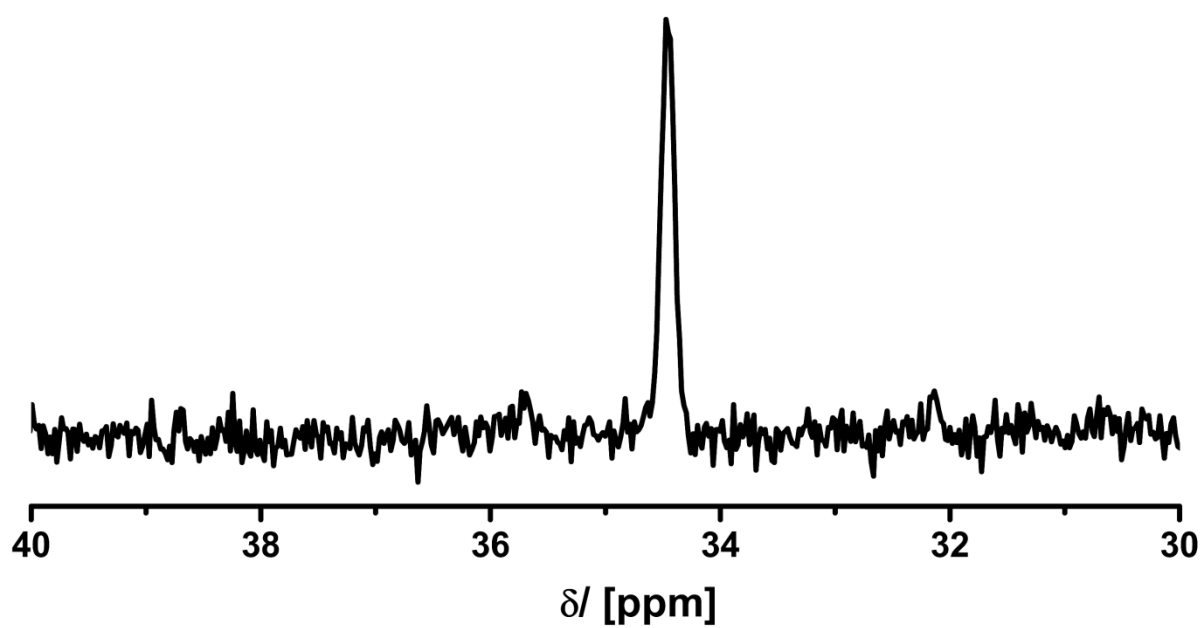

**SI-3: Analytical data for decomposition product 4; DP-4.**

**$^1\text{H}$ -NMR**

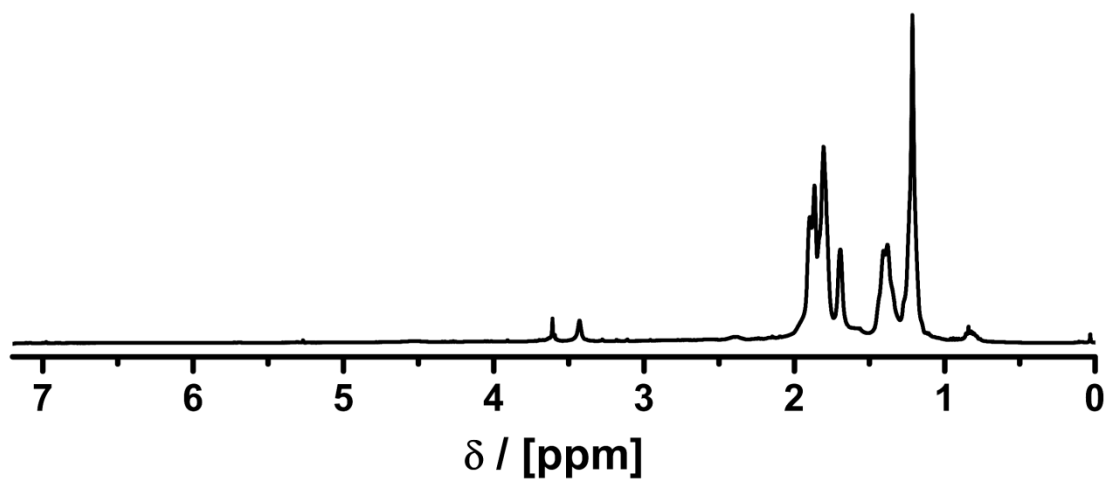

**$^{13}\text{C}$ -NMR:**

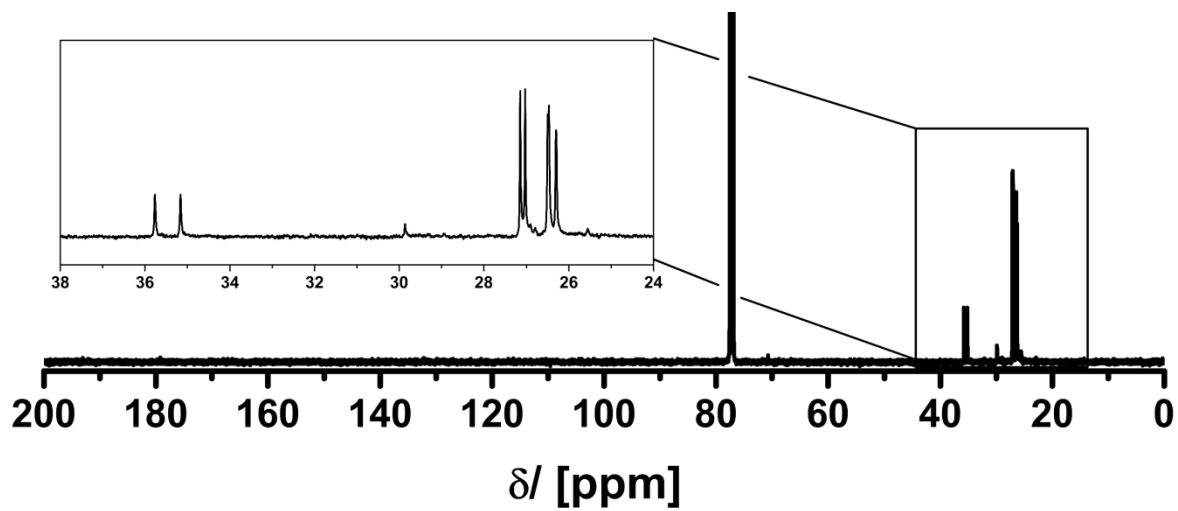

$^{31}\text{P}$ -NMR:

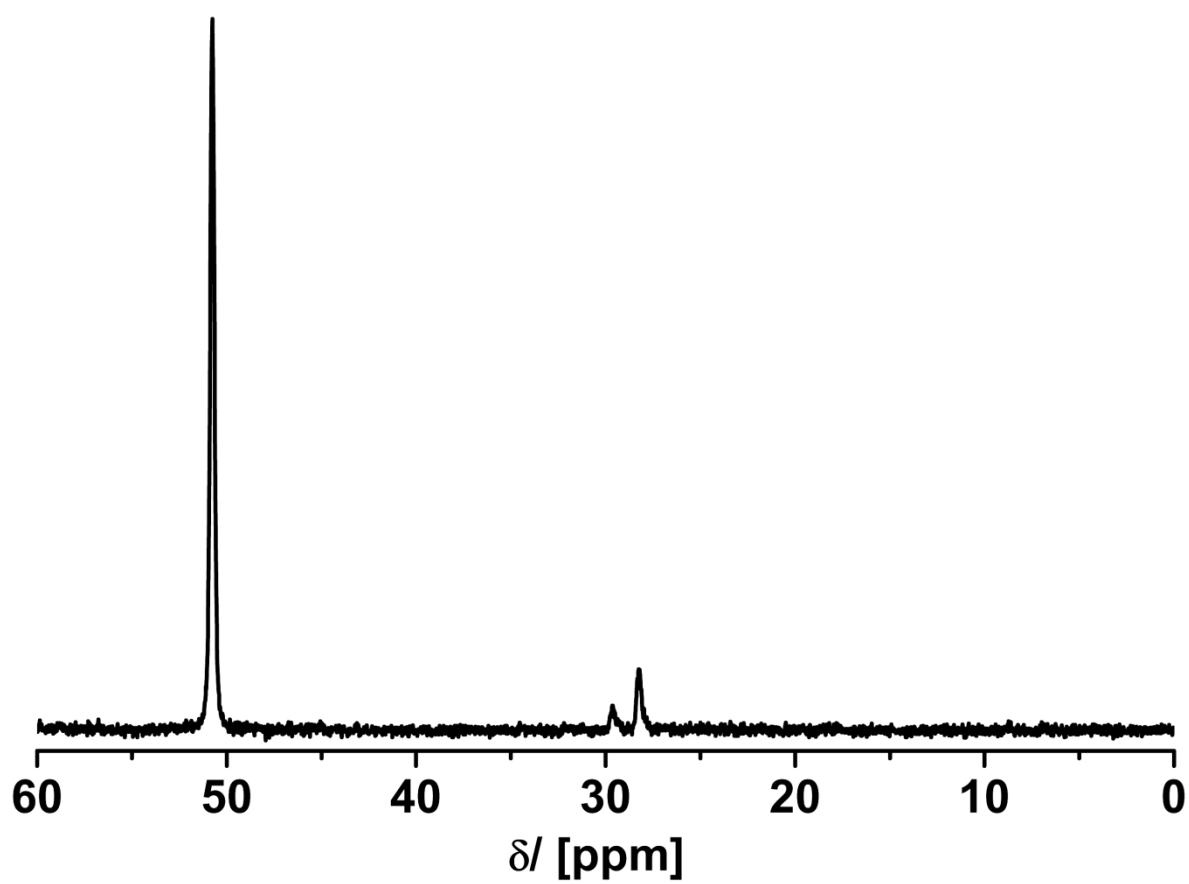

EDX-spectrum

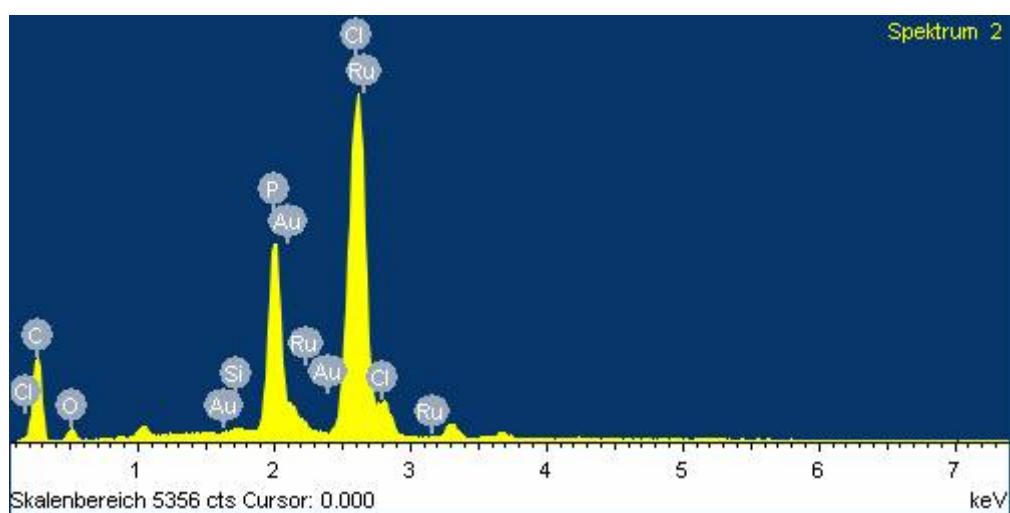

***FAB-MS:***

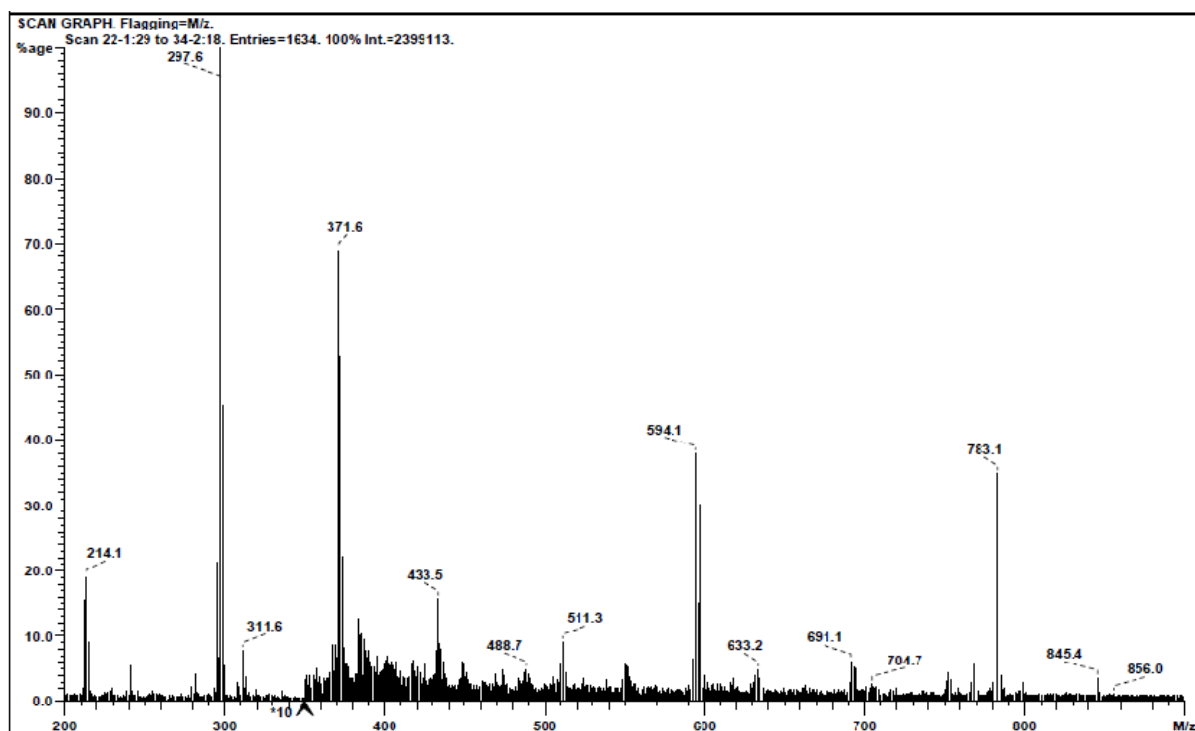

***ESI-MS:***

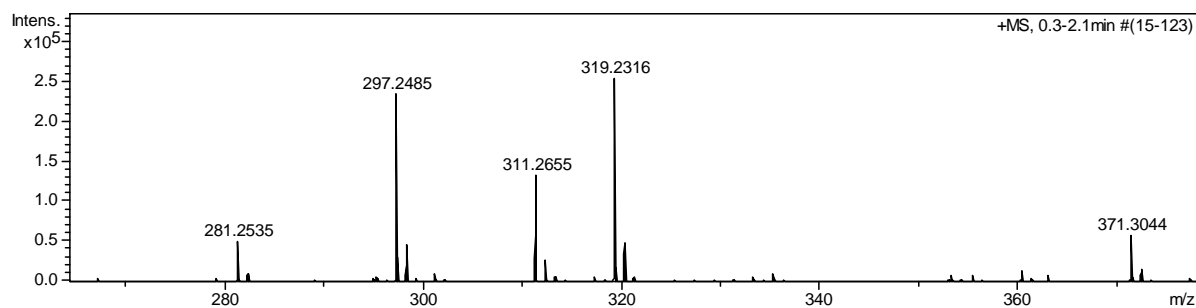



**SI-4:** Stability of the Grubbs catalyst in silylated, mesoporous silica.

$^{31}\text{P}$ -NMR:

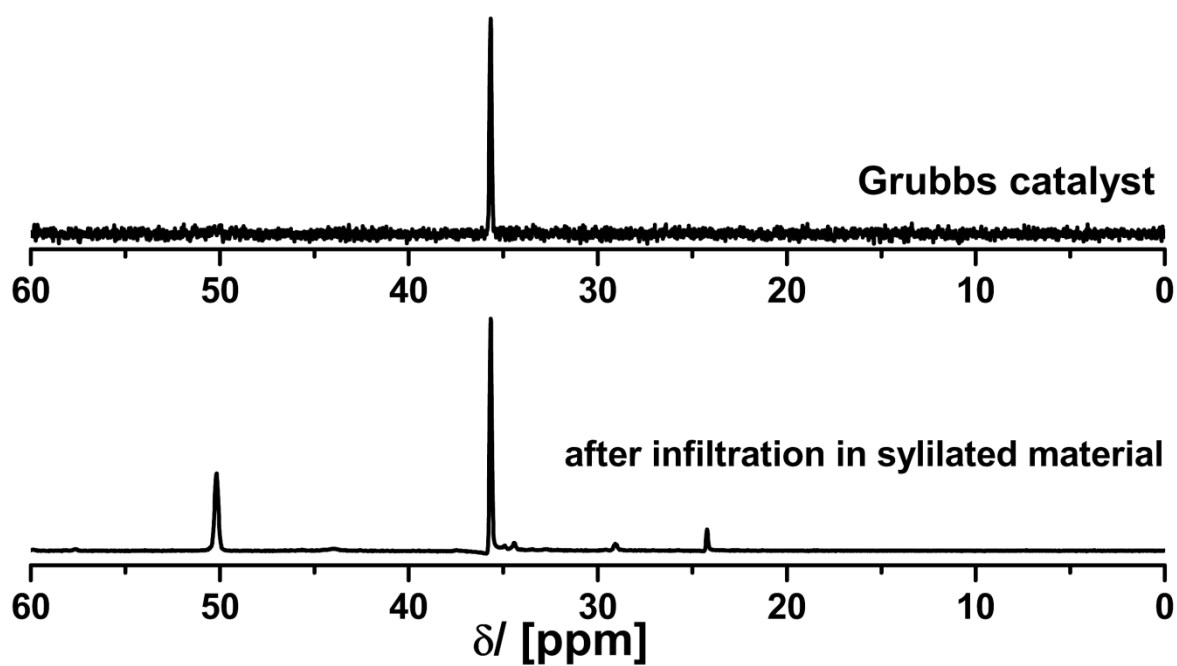

Supplement: b911795b.pdf [file b911795b.pdf]
